# Supplementary material for: The activity of phenoloxidase in haemolymph plasma is not a predictor of Lymantria dispar resistance to its baculovirus
Source: PLoS One. 2017 Aug 30;12(8):e0183940. doi: 10.1371/journal.pone.0183940 (PMC5576713; doi:10.1371/journal.pone.0183940)
Supplement: S1 Dataset — (XLS) [file pone.0183940.s001.xls]

## Sheet: Fig.1 data
viral strain	duration before pupation	number of larvae	sex	PO activity, A/min/mg	PO activity, A/min/mkl			viral strain	duration before pupation	number of larvae	sex	weight	PO activity, A/min/mg	PO activity, A/min/mkl
LdMNPV -27/0	13	29	m	0.0863629	0.000303333			LdMNPV-NY	28	185	f	645	0.190939	0.00064
LdMNPV -27/0	12	117	m	0.0493064	0.00061			LdMNPV-NY	28	237	f	139	0.29103	0.000703333
LdMNPV -27/0	28	127	m	0.117249	0.000693333			LdMNPV-NY	28	272	f	214	0.584692	0.00201333
LdMNPV -27/0	11	208	m	0.00555373	2e-05			LdMNPV-NY	28	381	f	331	0.261371	0.00118
LdMNPV -27/0	12	229	m	0.0441465	0.000633333			LdMNPV-NY	28	410	f	288	0.534817	0.00261667
LdMNPV -27/0	28	604	m	0.070244	0.0005			LdMNPV-NY	28	205	m		0.0264524	0.000323333
LdMNPV -27/0	28	98	f	0.0522829	0.000653333			LdMNPV-NY	11	214	m	581	0.125662	0.00130333
LdMNPV -27/0	28	108	f	0.541586	0.00608667			LdMNPV-NY	28	234	m	164	0.172919	0.00051
LdMNPV -27/0	28	137	f	0.183816	0.00146667			LdMNPV-NY	28	247	m	135		0.00355333
LdMNPV -27/0	28	316	f	0.804922	0.00235333			LdMNPV-NY	28	255	m	148	0.787245	0.00227692
LdMNPV -27/0	28	327	f	0.819448	0.00274667			LdMNPV-NY	28	263	m	158	1.04431	0.00304
LdMNPV -27/0	28	422	f	0.316333	0.00215			LdMNPV-NY	28	270	m	130	0.98549	0.00277333
LdMNPV -27/0	28	463	f	0.42354	0.00327			LdMNPV-NY	28	275	m	144	0.412311	0.00147
LdMNPV -27/0	28	545	f	0.734654	0.00521667			LdMNPV-NY	28	289	m	150	0.477998	0.00184333
LdMNPV -27/0	28	554	f	0.753171	0.00320333			LdMNPV-NY	28	430	m	344	0.175748	0.000606667
LdMNPV -27/0	19	8	l	0.152034	0.000763333			LdMNPV-NY	28	563	m		0.127736	0.000526667
LdMNPV -27/0	19	9	l	0.195803	0.00119333			LdMNPV-NY	28	623	m		0.336712	0.00154
LdMNPV -27/0	20	18	l	0.135675	0.00187			LdMNPV-NY	15	5	l	186	0.0586944	0.000206667
LdMNPV -27/0	20	19	l	0.0408818	0.000246667			LdMNPV-NY	12	15	l	189	0.0407998	0.0004
LdMNPV -27/0	20	28	l					LdMNPV-NY	16	25	l	200	0.00541869	1.33333e-05
LdMNPV -27/0	18	38	l	0.197634	0.00311667			LdMNPV-NY	22	54	l	484	0.345251	0.00315333
LdMNPV -27/0	20	39	l	0.115905	0.00098			LdMNPV-NY	22	64	l	205	0.337728	0.00230667
LdMNPV -27/0	22	49	l	0.0871995	0.00098			LdMNPV-NY	28	74	l		0.184929	0.00321667
LdMNPV -27/0	21	58	l	0.250025	0.00297667			LdMNPV-NY	15	75	l	388	0.0307844	0.0001
LdMNPV -27/0	20	78	l	0.0691717	0.00035			LdMNPV-NY	22	84	l	463	0.223729	0.00243667
LdMNPV -27/0	28	88	l	0.260535	0.00267333			LdMNPV-NY	20	85	l	382	0.0936374	0.00109
LdMNPV -27/0	21	107	l	0.178448	0.000713333			LdMNPV-NY	16	95	l	611	0.0904705	0.00209667
LdMNPV -27/0	28	128	l	0.351209	0.00275667			LdMNPV-NY	17	104	l	344	0.676977	0.00334667
LdMNPV -27/0	11	138	l	0.258225	0.00286			LdMNPV-NY	20	105	l	392	0.527075	0.00287333
LdMNPV -27/0	15	148	l	0.173734	0.00227667			LdMNPV-NY	14	114	l	315	0.0453327	0.000396667
LdMNPV -27/0	23	168	l	0.253752	0.00384333			LdMNPV-NY	20	115	l	398	0.257286	0.00264
LdMNPV -27/0	19	178	l	0.750039	0.00257			LdMNPV-NY	28	126	l		0.29948	0.00304
LdMNPV -27/0	19	189	l	0.227803	0.00121667			LdMNPV-NY	13	135	l	281	0.370362	0.00336
LdMNPV -27/0	19	199	l	0.31683	0.00394333			LdMNPV-NY	22	145	l	486	0.451849	0.00427667
LdMNPV -27/0	24	218	l	0.077626	0.000916667			LdMNPV-NY	13	165	l	508	0.303617	0.00320333
LdMNPV -27/0	18	219	l	0.0768616	0.00135333			LdMNPV-NY	17	174	l	438	0.231208	0.00111667
LdMNPV -27/0	20	228	l	0.300503	0.00254667			LdMNPV-NY	18	175	l	585	0.0816593	0.000946667
LdMNPV -27/0	17	306	l		0.00335333			LdMNPV-NY	17	194	l	336	0.6227	0.00162
LdMNPV -27/0	15	307	l	0.431938	0.00151333			LdMNPV-NY	14	215	l	540	0.0406986	0.00085
LdMNPV -27/0	18	317	l	0.404114	0.00147			LdMNPV-NY	24	224	l	397	0.0597456	0.000513333
LdMNPV -27/0	22	336	l					LdMNPV-NY	23	225	l	600	0.106448	0.00195667
LdMNPV -27/0	18	337	l
LdMNPV -27/0	11	346	l	0.249084	0.00150667			LdMNPV-NY	17	236	l	172	0.924151	0.00233667
LdMNPV -27/0	16	356	l	0.722101	0.00263333			LdMNPV-NY	17	238	l	166	0.202179	0.000503333
LdMNPV -27/0	13	366	l	0.418346	0.00193333
LdMNPV -27/0	16	376	l		0.00300333			LdMNPV-NY	22	240	l	177	0.474571	0.00134667
LdMNPV -27/0	14	382	l	0.442703	0.0029			LdMNPV-NY	13	242	l	140	1.10483	0.00349667
LdMNPV -27/0	16	392	l	0.218552	0.00203667			LdMNPV-NY	16	244	l	146	0.265908	0.00087
LdMNPV -27/0	16	393	l	0.351959	0.00197333			LdMNPV-NY	28	245	l		0.400412	0.000986667
LdMNPV -27/0	18	402	l	0.461189	0.00165667			LdMNPV-NY	18	246	l	108	0.255941	0.000746667
LdMNPV -27/0	20	403	l	0.259853	0.00156			LdMNPV-NY	18	248	l	146	0.385462	0.00097
LdMNPV -27/0	16	412	l	0.340786	0.00256333			LdMNPV-NY	14	249	l	140	0.0325168	0.000166667
LdMNPV -27/0	18	413	l	0.377153	0.00275667			LdMNPV-NY	9	253	l	155	0.728374	0.00240615
LdMNPV -27/0	16	423	l	0.408473	0.00110667			LdMNPV-NY	11	254	l	254	0.681481	0.0016841
LdMNPV -27/0	15	433	l	0.692657	0.00333667			LdMNPV-NY	16	256	l	133
LdMNPV -27/0	14	442	l	0.474673	0.00249			LdMNPV-NY	16	257	l	152	1.13393	0.00280222
LdMNPV -27/0	16	443	l	0.187575	0.00149667			LdMNPV-NY	18	258	l	134	0.695221	0.00194444
LdMNPV -27/0	18	453	l	0.318882	0.00178333			LdMNPV-NY	14	260	l	146	0.984432	0.00275333
LdMNPV -27/0		462	l	0.385938	0.00261667			LdMNPV-NY	17	261	l	117
LdMNPV -27/0	23	472	l	0.448252	0.00310667			LdMNPV-NY	19	262	l	180	0.789943	0.00251778
LdMNPV -27/0	14	482	l	0.547252	0.00352333			LdMNPV-NY	12	264	l	120
LdMNPV -27/0	18	492	l	0.450777	0.00247			LdMNPV-NY	18	265	l	155	0.79563	0.00267333
LdMNPV -27/0	19	502	l	0.373322	0.00228667			LdMNPV-NY	13	266	l	166	0.808657	0.00248333
LdMNPV -27/0	16	512	l	0.33053	0.00243333			LdMNPV-NY	18	269	l	140	0.594367	0.00194
LdMNPV -27/0	28	521	l	0.273531	0.00323667			LdMNPV-NY	12	271	l	149	0.655401	0.00262667
LdMNPV -27/0	19	522	l	0.277593	0.00236333			LdMNPV-NY	16	273	l	120	0.996803	0.00303333
LdMNPV -27/0	18	531	l	0.099765	0.00143667			LdMNPV-NY	23	274	l	147	0.750492	0.00210333
LdMNPV -27/0	13	544	l	0.167142	0.00261667			LdMNPV-NY	14	276	l	195	1.09986	0.00273
LdMNPV -27/0	22	555	l	0.551235	0.00213667			LdMNPV-NY	11	277	l	140	0.494541	0.00140333
LdMNPV -27/0	15	564	l	0.413052	0.00357333			LdMNPV-NY	11	278	l	137	1.01146	0.00327
LdMNPV -27/0	16	565	l	0.305461	0.00363667			LdMNPV-NY	18	279	l	155
LdMNPV -27/0	16	584	l	0.412767	0.00336333			LdMNPV-NY	14	282	l	144	0.621546	0.00179
LdMNPV -27/0	17	585	l	0.302561	0.00257			LdMNPV-NY	16	283	l	140	0.305395	0.00094
LdMNPV -27/0	15	594	l	0.352337	0.00341667			LdMNPV-NY	28	284	l		0.693632	0.00194
LdMNPV -27/0	16	595	l	0.520424	0.00273			LdMNPV-NY	15	285	l	171	0.493595	0.00153333
LdMNPV -27/0	12	605	l	0.256859	0.00320333			LdMNPV-NY	17	286	l	128	0.72888	0.00218333
LdMNPV -27/0	16	614	l	0.291806	0.00255333			LdMNPV-NY	16	288	l	170	0.857118	0.0027
LdMNPV -27/0	18	624	l	0.274996	0.00302667			LdMNPV-NY	15	290	l	131	0.769794	0.00361333
LdMNPV -27/0	15	634	l	0.19951	0.00341			LdMNPV-NY	17	291	l	164
								LdMNPV-NY	15	292	l	182	1.15318	0.00318
								LdMNPV-NY	21	293	l	131	0.437534	0.00172667
								LdMNPV-NY	17	295	l	134	0.21605	0.00132667
								LdMNPV-NY	11	297	l	143	0.489372	0.00144333
								LdMNPV-NY	16	298	l	161	0.637897	0.00365
								LdMNPV-NY	16	300	l	129		0.00567
								LdMNPV-NY	18	301	l	179	0.343129	0.00151333
								LdMNPV-NY	18	302	l	153	0.48434	0.0016
								LdMNPV-NY	16	303	l	131		0.00521667
								LdMNPV-NY	20	305	l	171	0.852022	0.00244333
								LdMNPV-NY	15	315	l	207	0.88703	0.00357333
								LdMNPV-NY	17	344	l	266
								LdMNPV-NY	14	345	l	262	0.299997	0.00139
								LdMNPV-NY	15	354	l	208	0.862211	0.00289
								LdMNPV-NY	12	355	l	221	0.514404	0.00211
								LdMNPV-NY	16	365	l	251	0.981229	0.00367
								LdMNPV-NY	16	374	l	254	0.269823	0.00228667
								LdMNPV-NY	17	375	l	226	0.795145	0.00309
								LdMNPV-NY	17	391	l	348	0.293913	0.00159
								LdMNPV-NY	19	401	l	436	0.172304	0.00169667
								LdMNPV-NY	14	411	l	276	1.11077	0.00424
								LdMNPV-NY	14	420	l	303	0.802597	0.00274333
								LdMNPV-NY	14	421	l	272	0.599565	0.00259
								LdMNPV-NY	19	431	l	342	0.121035	0.00105667
								LdMNPV-NY	20	440	l	345	0.482195	0.00224
								LdMNPV-NY	14	450	l	374	0.169388	0.00220667
								LdMNPV-NY	16	451	l	358	0.360046	0.00218333
								LdMNPV-NY	17	460	l	280	0.46249	0.00323667
								LdMNPV-NY	15	461	l	314	0.314194	0.00228
								LdMNPV-NY	15	470	l	339	0.245437	0.00223667
								LdMNPV-NY	15	471	l	385	0.0571014	0.00039
								LdMNPV-NY	16	481	l	295	0.587956	0.00358333
								LdMNPV-NY		490	l	331	0.354633	0.00326815
								LdMNPV-NY	11	491	l	288	0.475062	0.00422333
								LdMNPV-NY	28	500	l		0.414445	0.00211333
								LdMNPV-NY	19	501	l	395	0.0729133	0.00066
								LdMNPV-NY	13	510	l	303	0.455274	0.00328
								LdMNPV-NY	17	511	l	351	0.270752	0.00323
								LdMNPV-NY	11	520	l	297	0.414697	0.00248333
								LdMNPV-NY	16	530	l	318	0.22386	0.00197667
								LdMNPV-NY	18	543	l	553	0.130043	0.00141333
								LdMNPV-NY	14	553	l	305	0.25207	0.00112333
								LdMNPV-NY	15	572	l	405	0.550416	0.0035
								LdMNPV-NY	16	573	l	367	0.840521	0.00371667
								LdMNPV-NY	14	583	l	353	0.370179	0.00183
								LdMNPV-NY	15	592	l	402	0.26352	0.00281
								LdMNPV-NY	19	593	l	510	0.303255	0.00322
								LdMNPV-NY	16	602	l	443	0.492928	0.00478
								LdMNPV-NY	17	603	l	338	0.44529	0.00236
								LdMNPV-NY	17	612	l	471	0.323945	0.00278333
								LdMNPV-NY	16	613	l	351	0.434285	0.00304667
								LdMNPV-NY	11	632	l	414	0.284038	0.00220333
								LdMNPV-NY	28	642	l		0.467393	0.00400667
								LdMNPV-NY	8	652	l	469	0.518252	0.00478667

## Sheet: Fig. 2 data
	PO activity, A/min/mg	PO activity, A/min/mkl
control	0.0015275	0.0212304
control	0.0054825
control	0.00046	0.00805157
control	0.00254	0.0349139
control	0.0029175	0.054626
control	0.0007525	0.0112751
control	0.0003925	0.00763357
control	0.00244	0.0308865
control	0.000205	0.00318123
control	0.00027	0.00603271
control	0.0021425	0.0625963
control	0.0024025	0.0458036
control	0.0004125	0.0410716
control	0.000805	0.0263278
control	0.0002925	0.0064422
ptu	0.0002325	0.0100316
ptu	7.75e-05	0.00655708
ptu	0.0009
ptu	9.75e-05	0.00361547
ptu	0.0003825	0.0153509
ptu	0.0003925	0.00459725
ptu	0.00015	0.00427418
ptu	0.00396
ptu	0.00058	0.0179902
ptu	0.0002025	0.00534283
ptu	0.0002325	0.00410179
ptu	0.000285	0.0132641
ptu	0.00029	0.00970105
ptu	0.000325	0.00547125
ptu	5.25e-05	0.00306087

## Sheet: Fig. 3 data
treatment	Nr of replicates	initial number of larvae	number of dead larvae	mortality,%	arcsine transormation of mortality data
native	1	10	0	0	0
native	2	10	0	0	0
native	3	10	0	0	0
native	4	10	0	0	0
native	5	10		0	0
PTU	1	10	0	0	0
PTU	2	10	0	0	0
PTU	3	10	0	0	0
PTU	4	10	0	0	0
PTU	5	10	0	0	0
Virus	1	10	0	0	0
Virus	2	10	2	20	26.5651
Virus	3	10	1	10	18.4349
Virus	4	10	1	10	18.4349
Virus	5	10	5	50	45
Virus+PTU	1	10	3	30	33.2109
Virus+PTU	2	10	1	10	18.4349
Virus+PTU	3	10	5	50	45
Virus+PTU	4	10	4	40	39.2315
Virus+PTU	5	9	2	22.2222	28.1255

## Sheet: Fig. 4 data
treatment	Nr of replicates	initial number of larvae	number of dead larvae	mortality,%	arcsine transormation of mortality data
control	1	20	0	0	0
control	2	20	0	0	0
control	3	20	0	0	0
control	4	20	2	10	18.4349
control	5	20	0	0	0
PTU	1	19	1	5.26316	13.2627
PTU	2	19	2	10.5263	18.9318
PTU	3	20	0	0	0
PTU	4	20	0	0	0
PTU	5	20	0	0	0

## Sheet: fig. 5 data
treatment	duration of starvation, days	PO activity, A/min/mkl	PO activity, A/min/mg
control	1	0.00042
control	1	0.0005
control	1	0.000493333
control	1	0.00114667
control	1	0.00024
control	1	0.000313333
control	1	0.00147
control	1	0.000176667
control	1	0.000643333
control	1	0.00033
control	1	0.000256667	0.0202335
control	1	0.000196667	0.00875326
control	1	0.00011	0.00816281
control	1	0.000823333
control	1	0.000126667	0.00852108
control	1	0.00021	0.00914269
control	1	0.000113333	0.0120025
control	1	0.0003	0.0315395
control	1	0.00108	0.189529
control	1	0.000133333	0.0129592
starved	1	0.00119333	0.181234
starved	1	0.00112	0.235873
starved	1	0	0.0566195
starved	1	0.000893333	0.098929
starved	1	0.000993333
starved	1	0.00103333	0.155502
starved	1	0.000513333	0.190487
starved	1	0.00163333	0.50839
starved	1	0.00119	0.0877846
starved	1	0.00121667	0.22477
starved	1	0.00083	0.117307
starved	1	0.000463333	0.214753
starved	1	0.000656667	0.480788
starved	1	0	0.0273633
starved	1	0.00164333	0.303594
starved	1	0.00107	0.0813245
starved	1	0.00142333	0.471049
starved	1	0.00143	0.504641
starved	1	0.000886667	0.630776
starved	1	0.00127
control	2	0.000183333	0.0110042
control	2	0.000176667	0.00468323
control	2	0.000253333	0.024795
control	2	0.000183333	0.0195593
control	2	0.00011	0.0154111
control	2	0.000436667	0.099834
control	2	0.00036	0.0236837
control	2	0.000186667	0.00724604
control	2	0.000216667	0.0215065
control	2	0.000406667	0.028963
control	2	0.000153333	0.0187884
control	2	0.00022	0.0398082
control	2	0.000156667	0.0151215
control	2		0.0773655
control	2	0.000143333	0.00577617
control	2	0.000113333	0.00745599
control	2	0.000173333	0.012133
control	2	0.00028	0.0195995
control	2	0.000823333	0.0669519
control	2	0.00016	0.0103534
starved	2	0.00107667	0.652895
starved	2	0.000833333	0.118821
starved	2		0.0423854
starved	2	0.00117333	0.325507
starved	2	0.000856667	0.910776
starved	2	0.000976667	0.333645
starved	2	0.00127667	0.517402
starved	2	0.000953333	0.450953
starved	2	0.0009	0.112075
starved	2	0.00113667	0.516387
starved	2		0.211106
starved	2	0.000873333	0.0590817
starved	2	0.00086	0.138161
starved	2	0.0008	0.24532
starved	2	0.000996667	0.284318
starved	2	0.000903333	0.261367
starved	2	0.000946667	0.252115
starved	2	0.00120333	0.307998
starved	2	0.000816667	0.44987
starved	2	0.000976667	0.135645
control	3	0.00045	0.0390064
control	3	0.000486667	0.0301557
control	3	0.00035	0.0193515
control	3	0.000403333	0.0527716
control	3	0.00025	0.0106494
control	3	0.00035	0.0415437
control	3	0.000286667	0.0139107
control	3	0.000243333	0.0213698
control	3	0.000253333	0.099043
control	3	0.000226667	0.0382221
control	3	0.00024	0.0555396
control	3	0.00015	0.028301
control	3	0.000343333	0.0965789
control	3	0.000426667	0.0502475
control	3	0.000356667	0.0625914
control	3	0.000563333	0.0539976
control	3	0.000416667
control	3	0.00114	0.0898683
control	3	0.000693333	0.0997386
control	3	0.000313333	0.10704
starved	3	0.00117	1.41161
starved	3	0.00162667	0.684077
starved	3	0.00228667	1.45914
starved	3	0.00140333	1.02747
starved	3	0.00141333	0.284564
starved	3	0.00112333	0.349648
starved	3	0.000836667	0.404037
starved	3	0.00101	0.835834
starved	3	0.00143	1.0173
starved	3	0.00107	0.700965
starved	3	0.00158333	0.471481
starved	3	0.00365667
starved	3	0.00106333	0.513497
starved	3	0.00134	0.689957
starved	3	0.000953333	0.525155
starved	3	0.00198333	0.62671
starved	3	0.00278333
starved	3	0.00138333	1.59759
starved	3	0.00103333	0.251267
starved	3	0.00110333	0.491448
control	4	0.00086	0.191969
control	4	0.00103667	0.255286
control	4	0.000263333	0.127167
control	4	0.000293333	0.177879
control	4	0.00044	0.114106
control	4	0.00119333	0.240269
control	4	0.00095	0.113655
control	4	0.000956667
control	4	0.000253333	0.0776848
control	4	0.00108667	0.228853
control	4	0.00125667	0.0498018
control	4	0.000546667	0.131272
control	4	0.000826667	0.235822
control	4	0.00052	0.144259
control	4	0.00023	0.0399582
control	4	0.000386667	0.0692507
control	4	0.000273333	0.0526837
control	4	0.000373333	0.129613
control	4	0.000116667	0.0657844
control	4	0.000513333	0.105687
starved	4	0.00338
starved	4	0.002	0.19575
starved	4	0.00328667	1.08771
starved	4	0.000143333	0.0664344
starved	4	0.00199667	0.964215
starved	4	0.000136667	0.0534311
starved	4	0.000816667	0.288198
starved	4	0.000176667	0.0678628
starved	4	0.000346667	0.112954
starved	4	0.000203333	0.104695
starved	4	0.000283333	0.0318561
starved	4	0.00216333	1.11389
starved	4	0.000213333	0.0778324
starved	4	0.000193333	0.0592857
starved	4	0.00290667	0.977247
starved	4	0.00215667	0.444024
starved	4	0.000726667	0.219568
starved	4	0.000533333	0.0740723
starved	4	0.000236667	0.092527
starved	4	0.000193333	0.0529025

## Sheet: Fig. 6 data
control	starved
0	13
